# Supplementary material for: Visualization of Germination Proteins in Putative Bacillus cereus Germinosomes
Source: Int J Mol Sci. 2020 Jul 22;21(15):5198. doi: 10.3390/ijms21155198 (PMC7432890; doi:10.3390/ijms21155198)
Supplement: Supplementary file 1 [file ijms-21-05198-s001.pdf]

# Visualization of Germination Proteins in Putative *Bacillus cereus* Germinosomes

**Table S1.** Primers used in this study

| Primer names  | Primers sequence (5'→3')                                                | Restriction sites |
|---------------|-------------------------------------------------------------------------|-------------------|
| P_RB-F        | CCGGAATTCACCTTCCTATATCCGCT <sup>1</sup>                                 | <i>EcoR</i> I     |
| P_RB-R        | CGGGATCCTCTCACCCCTAACATATATC <sup>1</sup>                               | <i>Bam</i> H I    |
| RB-F          | CGGGATCCTGAGGTGAAATGAGCAATGA <sup>1</sup>                               | <i>Bam</i> H I    |
| RB-fuse-GFP-R | CTCGCCCTTGCTCACCATGCTGCCGCTGCCGCTGCCAG<br>GTGTATCGGTTGAAGA <sup>2</sup> |                   |
| RB-fuse-GFP-F | TCTTCAACCGATACACCTGGCAGCGGCAGCGGCAGC<br>ATGGTGAGCAAGGGCGAG <sup>2</sup> |                   |
| GFP-F         | GCTCTAGAATGGTGAGCAAGGGCGAG <sup>1</sup>                                 | <i>Xba</i> I      |
| GFP-R         | CCCAAGCTTTTACTTGTACAGCTCGTCCAT <sup>1</sup>                             | <i>Hind</i> III   |
| RA-F          | CGGGATCCATGTTTCGGTTTATCATCT                                             | <i>Bam</i> H I    |
| AC-fuse-B-R   | CATTGCTCATTTCACCTCACTATTCCCCGATTCCAGATT                                 |                   |
| AC-fuse-B-F   | AATCTGGAATCGGGGAATAGTGAGGTGAAATGAGCAA<br>TG                             |                   |
| P_D-F         | GCTCTAGAACAAACCATAAAGAACAGAGC                                           | <i>Xba</i> I      |
| D-fuse-mSi-R  | TTCTCCTTTACTCACCATGCTGCCGCTGCCGCTGCCCTG<br>TTCTTCCTTCTTCTCG             |                   |
| D-fuse-mSi-F  | CGAGAAGAAGGAAGAACAGGGCAGCGGCAGCGGCAG<br>CATGGTGAGTAAAGGAGAA             |                   |
| mSi-R         | CCGGAATTCCTTATTTGTATAGTTCATCCAT                                         | <i>EcoR</i> I     |
| 315-F         | ATGTTGTGTGGAATTGTGAG                                                    |                   |
| 315-R         | AAGGCGATTAAGTTGGGT                                                      |                   |

<sup>1</sup> The restriction sites are underlined.

<sup>2</sup> The linker sequence are in bold.

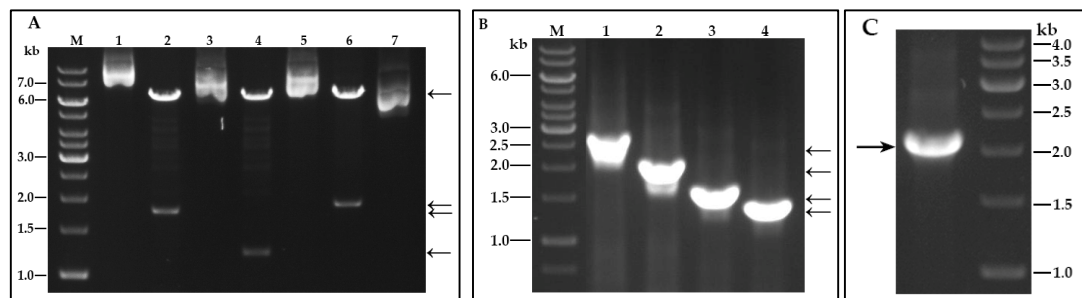

**Figure S1.** Validation of recombinant plasmids and pHT315-derived *B. cereus* strains. (A) Validation of recombinant plasmids with digestion analysis. Lane M, GeneRuler 1 kb DNA ladder (ThermoFisher Scientific). Lane 1, intact plasmid pHT315-PgerR-gerRB-SGFP2; lane 2, the *gerRB-SGFP2* 1.7 kb band and the vector backbone of the 6.5 kb plasmid pHT315-PgerR-gerRB-SGFP2 cut with *EcoR* I/*Hind* III; lane 3, intact plasmid pHT315-PaphA3'-SGFP2; lane 4, PaphA3'-SGFP2 1.2 kb band and the vector backbone of the 6.5 kb plasmid pHT315-PaphA3'-SGFP2 cut with *EcoR* I/*Hind* III; lane 5, intact plasmid pHT315-gerRB-SGFP2; Lane 6, the *gerRB-SGFP2* of 1.8 kb band and the vector backbone of the 6.5 kb plasmid pHT315-gerRB-SGFP2 cutting with *Bam*H I/*Hind* III; lane 7, intact plasmid pHT315. (B) Validation of pHT315-derived *B. cereus* strains. Lane 1, the expected 2.6 kb band was amplified from *B. cereus* carrying pHT315-PgerR-gerRB-SGFP2 strain; lane 2, the expected 2.0 kb band was amplified from *B. cereus* carrying pHT315-gerRB-SGFP2 strain; lane 3, the expected 1.4 kb band was amplified from *B. cereus* carrying pHT315-PgerR-SGFP2 strain; lane 4, the expected 1.3 kb band was amplified from *B. cereus* carrying pHT315-PaphA3'-SGFP2 strain. (C) expected 2.0 kb band in the left lane was amplified from *B. cereus* strain 007. The black arrows indicate the expected bands.

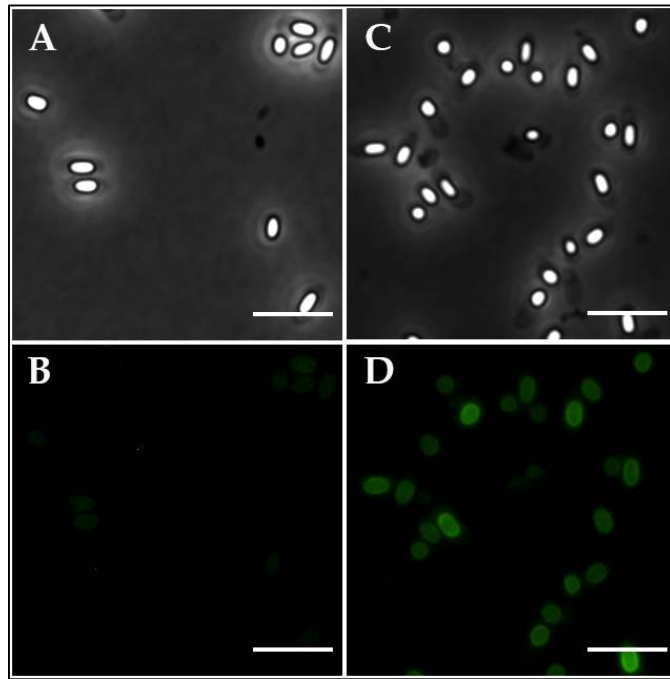

**Figure S2.** Confirmation of *PgerR* function by examining expression of protein SGFP2 in *B. cereus* dormant spores. Phase-contrast (A, C) and fluorescence microscopy images (B, D) of *B. cereus* dormant spores: (A, B) wild-type spores; (C, D) spores carrying pHT315-*PgerR*-SGFP2. All panels are at the same magnification, and the scale bar is 5 μm.

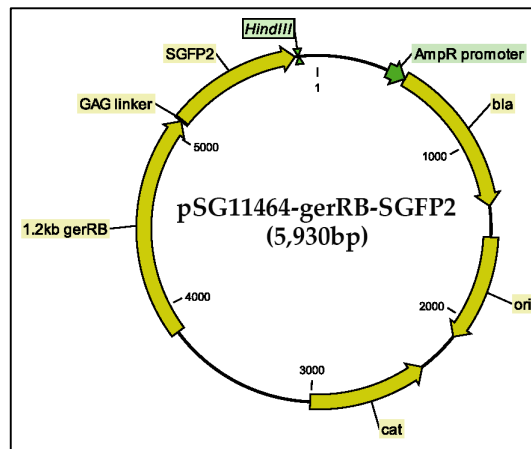

**Figure S3.** Schematic diagram of integration plasmid pSG1164-*gerRB*-SGFP2. The fusion gene *gerRB*-SGFP2 was used to attempt a single crossover integration of the plasmid into the wild-type *gerR* locus in the *B. cereus* chromosome, although this was not successful.
